# Supplementary material for: Global Genetic Population Structure of Bacillus anthracis
Source: PLoS One. 2007 May 23;2(5):e461. doi: 10.1371/journal.pone.0000461 (PMC1866244; doi:10.1371/journal.pone.0000461)
Supplement: Table S1 — The 221 MLVA Genotypes and Associated Can SNPs. The 221 genotypes (1–221, Column A) are organized according to their Keim Genetics Lab ID Designation (“A” number - Column B), prior designations when available (“K” numbers - Column C), their original MLVA8 GenoTyping designation (“GT” numbers: 1–89 - Column D) from Keim et al., (2000) and the alternative strain designations and original source codes for each isolate (Column E). This is followed by the isolate's canSNP lineage/group (Column F, also see Fig 1), two B. anthracis specific SNPs (Columns G and H), the13 canSNP scores (Columns I–U) and the 15 marker MLVA profile for that isolate (Columns W–AK). The first two SNPs (Column G and H) are Bacillus anthracis specific SNPs originally identified in the plcR and gyrA loci and are not part of the canSNP profile. There are 221 unique MLVA genotypes listed in this table. (0.15 MB XLS) [file pone.0000461.s001.xls]

## Sheet: Supplemental Table 5
Supplemental Table 5
						B. anthracis species specific SNPs		Canonical SNPs														MLVA15 data
	Keim ID # +country of origin	Keim et al "K" number Designation	2000 MLVA8 GT Number Designation	Various Strain Alternative Designation	canSNP lineage/group	plcR	GyrA	A.Br.001	A.Br002	A.Br.003	A.Br.004	A.Br.006	A.Br.007	A.Br.008	A.Br.009	B.Br.001	B.Br.002	B.Br.003	B.Br.004	A/B.Br.001	Keim Lab Sample Designation	vrrA	vrrB1	vrrB2	vrrC1	vrrC2	CG3	pX011aat	pX021at	Bavntr12	bavntr16	Bavntr17	Bavntr19	Bavntr23	Bavntr32	Bavntr35
1	A1055USA			2000031021	C.Br.A1005	A	C	T	G	A	T	C	T	T	A	T	G	G	T	G	A1055	N	O	N	H	L	M	1	G	L	P	O	M	L	T	M
2	A0231SOA	K3677	88	83	B.Br.Kruger	A	C	T	G	A	T	C	T	T	A	C	T	A	T	A	A0231	L	N	N	Q	I	M	J	M	L	P	L	M	M	L	K
3	A0442SOA	K6835	87	K88	B.Br.Kruger	A	C	T	G	A	T	C	T	T	A	C	T	A	T	A	A0442	L	N	N	Q	I	M	J	L	L	P	L	M	M	L	K
4	A0452MOZ			MOZ-2	B.Br.Kruger	A	C	T	G	A	T	C	T	T	A	C	T	A	T	A	A0452	L	N	N	Q	I	M	K	K	L	P	L	M	M	L	K
5	A0102MOZ	K2478	85	#3	B.Br.001/002	A	C	T	G	A	T	C	T	T	A	T	T	A	T	A	A0102	L	J	N	Q	I	M	K	K	L	P	L	M	L	L	K
6	A0242USA	K3535	89	35	B.Br.001/002	A	C	T	G	A	T	C	T	T	A	T	T	A	T	A	A0242	L	N	M	Q	I	M	K	L	L	P	L	M	M	L	K
7	A0352ENG	K0353		ASC-27	B.Br.001/002	A	C	T	G	A	T	C	T	T	A	T	T	A	T	A	A0352	L	N	N	Q	I	M	K	L	L	P	K	M	M	L	K
8	A0382SOA	K8101	82	80	B.Br.001/002	A	C	T	G	A	T	C	T	T	A	T	T	A	T	A	A0382	L	N	N	Q	I	M	K	M	L	P	L	M	M	L	K
9	A0361NOR	K1671	86	B286/76	B.Br.001/002	A	C	T	G	A	T	C	T	T	A	T	T	A	T	A	A0361	L	N	N	Q	I	M	J	J	L	P	L	M	M	L	K
10	A0091SOA			XXVII	B.Br.001/002	A	C	T	G	A	T	C	T	T	A	T	T	A	T	A	A0091	L	N	N	Q	I	M	K	J	L	O	L	M	M	L	K
11	A0490ZIM			50	B.Br.001/002	A	C	T	G	A	T	C	T	T	A	T	T	A	T	A	A0490	L	N	N	Q	I	M	K	K	L	O	L	M	M	L	K
12	A0451MOZ	K4849	83	MOZ-1	B.Br.001/002	A	C	T	G	A	T	C	T	T	A	T	T	A	T	A	A0451	L	N	N	Q	I	M	K	J	L	P	L	M	M	L	K
13	A2024USA			D01100382-1	B.Br.001/002	A	C	T	G	A	T	C	T	T	A	T	T	A	T	A	A2024	L	N	N	Q	I	M	K	J	L	T	L	M	M	L	K
14	A0104SOA	K3323	81	33	B.Br.001/002	A	C	T	G	A	T	C	T	T	A	T	T	A	T	A	A0104	L	N	N	Q	I	M	K	K	L	P	L	M	N	L	K
15	A1064USA			2000031046	B.Br.001/002	A	C	T	G	A	T	C	T	T	A	T	T	A	T	A	A1064	L	N	N	Q	I	M	1	K	L	U	L	M	M	L	K
16	A0500ZIM			57	B.Br.001/002	A	C	T	G	A	T	C	T	T	A	T	T	A	T	A	A0500	L	N	N	Q	I	M	L	K	L	P	L	M	M	L	K
17	A0402FRA	K1887	79	CNEVA 9066	B.Br.CNEVA	A	C	T	G	A	T	C	T	T	A	T	G	A	C	A	A0402	L	L	M	Q	I	M	M	I	L	O	L	M	M	O	M
18	A1080ITA			2844/92/VR	B.Br.CNEVA	A	C	T	G	A	T	C	T	T	A	T	G	A	C	A	A1080	L	L	M	Q	I	M	M	I	L	P	L	M	M	O	M
19	A0327SLO	K8423		A25	B.Br.CNEVA	A	C	T	G	A	T	C	T	T	A	T	G	A	C	A	A0327	L	L	M	Q	I	M	M	I	L	N	L	M	M	O	M
20	A0465FRA	K2762	80	RA3	B.Br.CNEVA	A	C	T	G	A	T	C	T	T	A	T	G	A	C	A	A0465	L	L	M	Q	I	M	M	J	L	O	L	M	M	O	N
21	A0333GER	K6775		A46	B.Br.CNEVA	A	C	T	G	A	T	C	T	T	A	T	G	A	C	A	A0333	L	L	K	Q	I	M	P	I	L	N	L	M	M	O	M
22	A1085POL			Slide#2	B.Br.CNEVA	A	C	T	G	A	T	C	T	T	A	T	G	A	C	A	A1085	L	L	K	Q	I	M	M	I	L	N	L	M	L	O	M
23	A1088POL			Slide#3	B.Br.CNEVA	A	C	T	G	A	T	C	T	T	A	T	G	A	C	A	A1088	L	L	K	Q	I	M	M	I	L	O	L	M	L	O	M
24	A0394USA	K5616	62	Ames	A.Br.Ames	A	C	C	A	G	C	A	T	T	A	T	G	G	T	A	A0394	M	M	L	Q	I	M	K	L	M	K	M	L	N	P	M
25	A1115USA			none	A.Br.Ames	A	C	C	A	G	C	A	T	T	A	T	G	G	T	A	A1115	M	M	L	Q	I	M	K	K	M	L	M	L	N	P	M
26	A2012USA			4363BT000676-01	A.Br.Ames	A	C	C	A	G	C	A	T	T	A	T	G	G	T	A	A2012	M	M	L	Q	I	M	K	L	M	L	M	L	N	P	M
27	A0728CHI			63271	A.Br.Ames	A	C	C	A	G	C	A	T	T	A	T	G	G	T	A	A0728	N	M	M	Q	I	M	N	M	M	L	M	L	N	P	M
28	A0591CHI			63287	A.Br.001/002	A	C	T	A	G	C	A	T	T	A	T	G	G	T	A	A0591	M	M	M	Q	I	M	M	J	M	L	M	L	N	P	M
29	A0595CHI			63280	A.Br.001/002	A	C	T	A	G	C	A	T	T	A	T	G	G	T	A	A0595	M	M	M	Q	I	M	M	M	M	L	M	L	N	P	M
30	A0551CHI			63243	A.Br.001/002	A	C	T	A	G	C	A	T	T	A	T	G	G	T	A	A0551	M	M	M	Q	I	M	M	K	M	L	M	L	N	P	M
31	A0543CHI			63654	A.Br.001/002	A	C	T	A	G	C	A	T	T	A	T	G	G	T	A	A0543	M	M	M	Q	I	M	M	L	M	L	M	L	N	P	M
32	A0034CHI	K0610	57	24/32	A.Br.001/002	A	C	T	A	G	C	A	T	T	A	T	G	G	T	A	A0034	M	M	M	Q	I	M	K	L	M	L	M	L	N	P	M
33	A0577CHI			63253	A.Br.001/002	A	C	T	A	G	C	A	T	T	A	T	G	G	T	A	A0577	M	M	M	Q	I	M	K	K	M	L	M	L	N	P	M
34	A0719CHI			63262	A.Br.001/002	A	C	T	A	G	C	A	T	T	A	T	G	G	T	A	A0719	M	M	M	I	I	M	M	N	M	L	M	L	N	P	M
35	A0536CHI			63670	A.Br.001/002	A	C	T	A	G	C	A	T	T	A	T	G	G	T	A	A0536	M	M	M	Q	I	M	L	L	L	L	M	L	N	P	M
36	A0722CHI			63265	A.Br.001/002	A	C	T	A	G	C	A	T	T	A	T	G	G	T	A	A0722	M	M	M	Q	I	M	L	L	O	L	M	L	N	P	M
37	A0561CHI			63612	A.Br.001/002	A	C	T	A	G	C	A	T	T	A	T	G	G	T	A	A0561	M	M	M	Q	I	M	L	L	M	L	M	L	N	P	K
38	A0196CAN	K7841	58	9610	A.Br.001/002	A	C	T	A	G	C	A	T	T	A	T	G	G	T	A	A0196	M	M	M	Q	I	M	L	L	M	L	M	L	N	P	M
39	A0579CHI			63255	A.Br.001/002	A	C	T	A	G	C	A	T	T	A	T	G	G	T	A	A0579	M	M	M	Q	I	M	L	M	M	L	M	L	N	P	M
40	A0558CHI			63251	A.Br.001/002	A	C	T	A	G	C	A	T	T	A	T	G	G	T	A	A0558	M	M	M	Q	I	M	I	J	M	L	L	L	N	P	M
41	A0546CHI			63238	A.Br.001/002	A	C	T	A	G	C	A	T	T	A	T	G	G	T	A	A0546	L	M	M	Q	I	M	M	L	M	L	L	L	N	P	M
42	A0537CHI			63648	A.Br.001/002	A	C	T	A	G	C	A	T	T	A	T	G	G	T	A	A0537	M	M	M	Q	I	M	M	L	M	L	L	L	N	P	M
43	A0639CHI			63386	A.Br.001/002	A	C	T	A	G	C	A	T	T	A	T	G	G	T	A	A0639	M	M	M	Q	I	M	K	L	M	L	L	L	N	P	M
44	A0937THA			Lopburi Province	A.Br.001/002	A	C	T	A	G	C	A	T	T	A	T	G	G	T	A	A0937	M	M	N	Q	I	M	M	L	M	L	M	L	O	P	M
45	A0389IDO	K1938	63	89	A.Br.001/002	A	C	T	A	G	C	A	T	T	A	T	G	G	T	A	A0389	M	M	M	Q	I	M	N	K	M	L	M	L	M	P	M
46	A0413IDO	K4527	64	Dompu	A.Br.001/002	A	C	T	A	G	C	A	T	T	A	T	G	G	T	A	A0413	M	M	N	Q	I	M	N	K	M	L	M	L	M	P	M
47	A0077AUS			27/7/98	A.Br.001/002	A	C	T	A	G	C	A	T	T	A	T	G	G	T	A	A0077	M	M	M	Q	I	M	M	J	M	C	M	L	M	H	M
48	A1045USA			1056	A.Br.001/002	A	C	T	A	G	C	A	T	T	A	T	G	G	T	A	A1045	M	M	M	Q	I	M	J	J	M	C	M	L	M	P	M
49	A0330GER	K1892	65	A40	A.Br.001/002	A	C	T	A	G	C	A	T	T	A	T	G	G	T	A	A0330	M	M	M	Q	I	M	O	J	L	C	M	L	M	H	M
50	A0332GER	K3777	61-like	A42	A.Br.001/002	A	C	T	A	G	C	A	T	T	A	T	G	G	T	A	A0332	M	M	M	Q	I	M	M	I	M	C	M	L	M	P	M
51	A3771HNK	J.Clin.Microbiol (2005) 43:1992 (CDC, Hong Kong Isolate)			A.Br.001/002			T	A	G	C	A	T	T	A	T	G	G	T	A	Hong Kong	M	M	M	Q	I	M	M	Z	M	L	M	L	M	P	M
52	A0935THA			#1 Tak Province	A.Br.001/002	A	C	T	A	G	C	A	T	T	A	T	G	G	T	A	A0935	M	M	M	Q	I	M	M	O	M	C	M	L	N	P	M
53	A0936THA			#2 Tak Province	A.Br.001/002	A	C	T	A	G	C	A	T	T	A	T	G	G	T	A	A0936	M	M	M	Q	I	M	M	O	M	C	M	L	P	P	M
54	A0341GER	K912	60	A9	A.Br.001/002	A	C	T	A	G	C	A	T	T	A	T	G	G	T	A	A0341	L	M	M	Q	I	M	M	L	M	C	N	L	N	P	M
55	A0541CHI			63652	A.Br.001/002	A	C	T	A	G	C	A	T	T	A	T	G	G	T	A	A0541	M	M	L	Q	I	M	L	L	M	L	L	L	N	P	N
56	A0103TUR	K2111		3 Samsun	A.Br.Aust94	A	C	T	G	G	C	A	T	T	A	T	G	G	T	A	A0103	M	M	M	Q	I	M	L	1	M	1	1	L	N	P	L
57	A0220AUS	K1298	66	97-1946/2	A.Br.Aust94	A	C	T	G	G	C	A	T	T	A	T	G	G	T	A	A0220	M	M	M	J	I	M	J	J	M	L	L	L	M	P	L
58	A0605CHI			63352	A.Br.Aust94	A	C	T	G	G	C	A	T	T	A	T	G	G	T	A	A0605	M	M	M	J	I	M	J	J	M	L	L	L	O	P	L
59	A0335GER	K4329		A6	A.Br.Aust94	A	C	T	G	G	C	A	T	T	A	T	G	G	T	A	A0335	M	M	M	J	I	M	1	J	M	L	L	L	N	P	L
60	A0614CHI			63361	A.Br.Aust94	A	C	T	G	G	C	A	T	T	A	T	G	G	T	A	A0614	M	M	M	J	G	M	J	J	M	L	L	L	O	P	L
61	A0709CHI			63464	A.Br.Aust94	A	C	T	G	G	C	A	T	T	A	T	G	G	T	A	A0709	M	M	M	J	G	M	J	K	M	L	L	L	O	P	L
62	A0248USA	K2802	68	28	A.Br.Aust94	A	C	T	G	G	C	A	T	T	A	T	G	G	T	A	A0248	L	M	L	R	I	M	L	L	M	L	L	L	N	P	L
63	A1053THA			2000031009	A.Br.Aust94	A	C	T	G	G	C	A	T	T	A	T	G	G	T	A	A1053	M	M	M	R	I	M	1	L	L	N	L	L	N	N	L
64	A0151TUR	K9527		34	A.Br.Aust94	A	C	T	G	G	C	A	T	T	A	T	G	G	T	A	A0151	M	M	M	R	I	M	L	L	M	L	L	L	N	M	L
65	A0274TUR	K7726	43	17	A.Br.Aust94	A	C	T	G	G	C	A	T	T	A	T	G	G	T	A	A0274	M	M	M	R	I	M	O	L	M	L	L	L	N	M	L
66	A0039AUS	K4834	55	29/32	A.Br.Aust94	A	C	T	G	G	C	A	T	T	A	T	G	G	T	A	A0039	M	K	M	R	I	M	L	K	M	L	L	L	M	P	L
67	A0048NAM	K2280	54	24	A.Br.Aust94	A	C	T	G	G	C	A	T	T	A	T	G	G	T	A	A0048	M	K	M	R	I	M	L	L	M	L	L	L	M	P	L
68	A0507IND	K2927		CS1337	A.Br.Aust94	A	C	T	G	G	C	A	T	T	A	T	G	G	T	A	A0507	M	M	M	R	I	M	N	N	M	L	L	L	N	I	L
69	A1046USA			1132	A.Br.Aust94	A	C	T	G	G	C	A	T	T	A	T	G	G	T	A	A1046	M	M	M	R	I	M	N	O	M	L	L	L	N	I	L
70	A0446NAM	K8025	40	1932-03-01	A.Br.Aust94	A	C	T	G	G	C	A	T	T	A	T	G	G	T	A	A0446	M	M	M	R	I	M	N	K	M	L	L	L	N	I	L
71	A0328GER	K2484	38	A30	A.Br.Aust94	A	C	T	G	G	C	A	T	T	A	T	G	G	T	A	A0328	M	M	M	R	I	M	N	S	M	L	L	L	N	I	L
72	A0188NAM	K1285	35	93/37	A.Br.Aust94	A	C	T	G	G	C	A	T	T	A	T	G	G	T	A	A0188	M	M	M	R	I	M	N	L	M	L	L	L	N	I	L
73	A0186NAM	K8903	56	93/197	A.Br.Aust94	A	C	T	G	G	C	A	T	T	A	T	G	G	T	A	A0186	M	K	M	R	I	M	N	L	M	L	L	L	N	I	L
74	A0049NAM	K2223	39	46	A.Br.Aust94	A	C	T	G	G	C	A	T	T	A	T	G	G	T	A	A0049	M	M	M	R	I	M	N	O	M	L	O	L	N	I	L
75	A0236ENG	K9268	47	15/32/Asc228	A.Br.Aust94	A	C	T	G	G	C	A	T	T	A	T	G	G	T	A	A0236	M	M	M	R	I	M	O	P	M	L	L	L	N	I	L
76	A0354ENG	K3342	49	ASC-29	A.Br.Aust94	A	C	T	G	G	C	A	T	T	A	T	G	G	T	A	A0354	M	M	M	R	I	M	M	M	M	L	L	L	N	I	L
77	A0252ZIM	K1110		ZIM69	A.Br.Aust94	A	C	T	G	G	C	A	T	T	A	T	G	G	T	A	A0252	M	M	M	R	I	M	N	K	M	L	L	L	O	P	L
78	A0529SOA			6057	A.Br.Aust94	A		T	G	G	C	A	T	T	A	T	G	G	T	A	A0529	M	M	M	R	I	M	N	Q	M	L	L	L	O	P	L
79	A0112NAM			K69	A.Br.Aust94	A	C	T	G	G	C	A	T	T	A	T	G	G	T	A	A0112	M	M	M	R	I	M	N	I	M	L	L	L	O	P	L
80	A0111SOA			193	A.Br.Aust94	A	C	T	G	G	C	A	T	T	A	T	G	G	T	A	A0111	M	M	M	R	I	M	N	P	M	L	L	L	O	P	L
81	A0109SOA			9922	A.Br.Aust94	A		T	G	G	C	A	T	T	A	T	G	G	T	A	A0109	M	M	M	R	I	M	N	O	M	L	L	L	O	P	L
82	A0087SOA			V14	A.Br.Aust94	A	C	T	G	G	C	A	T	T	A	T	G	G	T	A	A0087	M	M	M	R	I	M	N	N	M	L	L	L	O	P	L
83	A0088SOA			V20	A.Br.Aust94	A	C	T	G	G	C	A	T	T	A	T	G	G	T	A	A0088	M	M	K	R	I	M	N	L	M	L	L	L	O	P	L
84	A0152TUR	K1534	33	35	A.Br.Aust94	A	C	T	G	G	C	A	T	T	A	T	G	G	T	A	A0152	M	M	M	R	I	M	K	L	M	L	L	L	O	P	L
85	A0406IND	K2883	53	CS176(#5)	A.Br.Aust94	A	C	T	G	G	C	A	T	T	A	T	G	G	T	A	A0406	M	M	M	R	I	M	L	N	M	L	L	L	N	P	L
86	A0412SCO	K2980	50	1932-12-01	A.Br.Aust94	A	C	T	G	G	C	A	T	T	A	T	G	G	T	A	A0412	M	M	M	R	I	M	L	M	M	L	L	L	N	P	L
87	A0353ENG	K9505	48	ASC-28	A.Br.Aust94	A	C	T	G	G	C	A	T	T	A	T	G	G	T	A	A0353	M	M	M	R	I	M	L	P	M	L	L	L	N	P	L
88	A0404IND	K4342	52	CS176(#1	A.Br.Aust94	A	C	T	G	G	C	A	T	T	A	T	G	G	T	A	A0404	N	M	M	R	I	M	L	N	M	L	L	L	N	P	L
89	A0148TUR	K7791	37	31	A.Br.Aust94	A	C	T	G	G	C	A	T	T	A	T	G	G	T	A	A0148	M	M	M	R	I	M	N	M	M	L	L	L	N	P	L
90	A0286TUR	K1304	36	22	A.Br.Aust94	A	C	T	G	G	C	A	T	T	A	T	G	G	T	A	A0286	M	M	M	R	I	M	N	N	M	L	L	L	N	P	L
91	A0001TUR	K0300	42	39	A.Br.Aust94	A	C	T	G	G	C	A	T	T	A	T	G	G	T	A	A0001	M	M	M	M	I	M	N	L	M	L	L	L	N	P	L
92	A0260TUR	K1663		12	A.Br.Aust94	A	C	T	G	G	C	A	T	T	A	T	G	G	T	A	A0260	M	M	M	R	I	M	N	L	M	M	L	L	N	P	L
93	A0256TUR	K6428	41	11	A.Br.Aust94	A	C	T	G	G	C	A	T	T	A	T	G	G	T	A	A0256	L	M	M	R	I	M	N	L	M	L	L	L	N	P	L
94	A0083GER			36/1	A.Br.Aust94	A	C	T	G	G	C	A	T	T	A	T	G	G	T	A	A0083	M	M	M	R	I	M	M	L	M	L	L	L	N	P	L
95	A0254TUR	K2185		1	A.Br.Aust94	A	C	T	G	G	C	A	T	T	A	T	G	G	T	A	A0254	K	M	M	R	I	M	M	L	M	L	L	L	N	P	L
96	A0136TUR	K1117		4 Gubuk	A.Br.Aust94	A	C	T	G	G	C	A	T	T	A	T	G	G	T	A	A0136	M	M	M	R	I	M	N	L	M	L	L	L	N	P	L
97	A0468NAM	K1717	44	SA1189	A.Br.Aust94	A	C	T	G	G	C	A	T	T	A	T	G	G	T	A	A0468	M	M	M	R	I	M	L	L	M	L	L	L	N	P	L
98	A0513TUR	K3789		10	A.Br.Aust94	A	C	T	G	G	C	A	T	T	A	T	G	G	T	A	A0513	M	M	M	R	I	M	I	L	M	L	L	L	N	P	L
99	A03882ARG	K5816		BB79	A.Br003/004	A	C	T	G	A	C	A	T	T	A	T	G	G	T	A	A0388-2	M	M	M	R	I	M	M	L	M	L	N	L	N	M	L
100	A1099ARG			99179	A.Br.003/004	A	C	T	G	A	C	A	T	T	A	T	G	G	T	A	A1099	M	M	M	R	I	M	L	L	M	L	N	L	N	M	L
101	A0134USA	K3819		38	A.Br.003/004	A	C	T	G	A	C	A	T	T	A	T	G	G	T	A	A0134	M	M	M	R	I	M	N	L	M	L	N	L	N	M	L
102	A0094SOA			V22	A.Br.003/004	A	C	T	G	A	C	A	T	T	A	T	G	G	T	A	A0094	M	M	M	R	I	M	M	L	M	L	N	L	N	M	K
103	A03881ARG	K5816,K9968	46	BB79	A.Br.003/004	A	C	T	G	A	C	A	T	T	A	T	G	G	T	A	A0388-1	K	M	M	R	I	M	M	L	M	L	N	L	N	M	L
104	A0086SOA			V18	A.Br.003/004	A	C	T	G	A	C	A	T	T	A	T	G	G	T	A	A0086	N	M	M	R	I	M	M	L	M	L	N	L	N	M	L
105	A1060USA			2000031039	A.Br.003/004	A	C	T	G	A	C	A	T	T	A	T	G	G	T	A	A1060	N	M	M	R	I	M	M	L	M	L	M	L	N	M	L
106	A0376USA	K4516	51	45	A.Br.003/004	A	C	T	G	A	C	A	T	T	A	T	G	G	T	A	A0376	M	M	N	R	I	M	M	M	M	L	M	L	N	M	L
107	A0489ARG	K8215	45	ZB80	A.Br.003/004	A	C	T	G	A	C	A	T	T	A	T	G	G	T	A	A0489	M	M	M	R	I	M	M	L	M	L	M	L	N	M	L
108	A1107ARG			1199	A.Br.003/004	A	C	T	G	A	C	A	T	T	A	T	G	G	T	A	A1107	M	M	M	R	I	M	M	N	M	L	M	L	N	M	L
109	A1039BLV			27/7/99	A.Br.003/004	A	C	T	G	A	C	A	T	T	A	T	G	G	T	A	A1039	M	M	M	R	I	M	M	K	M	L	O	L	N	M	L
110	A1141ARG			77/185	A.Br.003/004	A	C	T	G	A	C	A	T	T	A	T	G	G	T	A	A1141	M	M	M	R	I	M	M	K	M	K	M	L	N	M	L
111	A0371USA	K9000	76-like	9	A.Br.Vollum	A	C	T	G	A	T	A	C	T	A	T	G	G	T	A	A0371	N	M	M	O	L	M	Q	K	N	L	M	M	N	P	L
112	A0078USA			C97212370	A.Br.Vollum	A	C	T	G	A	T	A	C	T	A	T	G	G	T	A	A0078	L	M	L	O	L	M	N	K	M	L	U	M	N	P	L
113	A0363NOR	K8822	78	B648/82	A.Br.Vollum	A	C	T	G	A	T	A	C	T	A	T	G	G	T	A	A0363	L	M	L	O	L	M	N	K	M	L	U	M	L	P	L
114	A1062USA			2000031043	A.Br.Vollum	A	C	T	G	A	T	A	C	T	A	T	G	G	T	A	A1062	L	M	L	O	L	M	1	1	L	1	1	M	N	P	L
115	A1058USA			2000031`030	A.Br.Vollum	A	C	T	G	A	T	A	C	T	A	T	G	G	T	A	A1058	M	M	L	O	L	M	N	J	M	L	T	M	N	P	L
116	A0473ENG	K4877	77-like	SG-??	A.Br.Vollum	A	C	T	G	A	T	A	C	T	A	T	G	G	T	A	A0473	K	M	L	O	L	M	N	K	M	L	U	M	L	N	L
117	A0416ZIM	K4072		1932-02-01	A.Br.Vollum	A	C	T	G	A	T	A	C	T	A	T	G	G	T	A	A0416	K	M	L	O	L	M	N	K	M	L	M	M	L	N	L
118	A0336SWI	K7615	75	A66	A.Br.Vollum	A	C	T	G	A	T	A	C	T	A	T	G	G	T	A	A0336	M	M	M	O	L	M	O	L	M	L	U	M	N	N	L
119	A0337PAK	K1129	74	A67	A.Br.Vollum	A	C	T	G	A	T	A	C	T	A	T	G	G	T	A	A0337	M	M	M	O	L	M	N	L	M	L	U	M	N	N	L
120	A0334GER	K9228		A59	A.Br.Vollum	A	C	T	G	A	T	A	C	T	A	T	G	G	T	A	A0334	M	M	M	O	L	M	N	L	N	L	U	M	N	N	L
121	A0338SWI	K1251		A68	A.Br.Vollum	A	C	T	G	A	T	A	C	T	A	T	G	G	T	A	A0338	M	M	M	O	L	M	M	K	M	L	M	M	N	N	L
122	A0359NOR	K8736	70	B1965/77	A.Br.Vollum	A	C	T	G	A	T	A	C	T	A	T	G	G	T	A	A0359	M	M	M	O	I	M	M	K	M	L	U	M	N	P	L
123	A0379PAK	K7222	69	72	A.Br.Vollum	A	C	T	G	A	T	A	C	T	A	T	G	G	T	A	A0379	M	M	M	O	I	M	N	K	M	L	U	M	N	P	L
124	A0038CHI	K6410	73	28/32	A.Br.Vollum	A	C	T	G	A	T	A	C	T	A	T	G	G	T	A	A0038	M	M	M	O	L	M	O	K	M	L	U	M	N	P	L
125	A0380IRE	K1021	71	102	A.Br.Vollum	A	C	T	G	A	T	A	C	T	A	T	G	G	T	A	A0380	M	M	M	O	L	M	N	K	M	L	U	M	N	P	L
126	A0612CHI			63359	A.Br.Vollum	A	C	T	G	A	T	A	C	T	A	T	G	G	T	A	A0612	M	M	M	O	L	M	N	K	M	L	U	M	N	N	L
127	A1059USA			200003107	A.BR.Vollum	A	C	T	G	A	T	A	C	T	A	T	G	G	T	A	A1059	L	M	M	O	N	M	1	1	M	1	1	L	N	N	L
128	A0415SOK	K1072	32	F-1	A.Br.005.006	A	C	T	G	A	T	A	T	T	A	T	G	G	T	A	A0415	M	M	M	R	I	M	K	K	L	M	N	N	N	N	L
129	A0421IDO	K8341		IRJA	A.Br.005.006	A	C	T	G	A	T	A	T	T	A	T	G	G	T	A	A0421	M	M	M	R	I	M	K	K	L	C	N	N	N	N	L
130	A0419SOK	K7038	34	H-1	A.Br.005.006	A	C	T	G	A	T	A	T	T	A	T	G	G	T	A	A0419	M	M	M	S	I	M	K	K	L	M	N	N	N	N	L
131	A0323SOK	K7407		A-1	A.Br.005.006	A	C	T	G	A	T	A	T	T	A	T	G	G	T	A	A0323	M	M	M	R	I	M	K	K	L	M	N	N	N	M	L
132	A0464IDO	K1024	31	Pangkep	A.Br.005.006	A	C	T	G	A	T	A	T	T	A	T	G	G	T	A	A0464	M	M	M	R	I	M	K	J	L	M	M	N	N	N	L
133	A0365NOR	K8419	27	B7227/83	A.Br.005.006	A	C	T	G	A	T	A	T	T	A	T	G	G	T	A	A0365	M	M	M	R	L	M	N	K	N	M	N	L	N	N	L
134	A0147ZAM	K1213		30/01/94	A.Br.005.006	A	C	T	G	A	T	A	T	T	A	T	G	G	T	A	A0147	M	M	M	R	I	M	K	I	M	M	M	N	N	K	L
135	A0158ZAM	K0123	30	48/09/92	A.Br.005.006	A	C	T	G	A	T	A	T	T	A	T	G	G	T	A	A0158	M	M	M	R	I	M	K	I	M	M	M	M	N	K	L
136	A2076TAN	Same A1067		TZ15, D99-2249	A.Br.005.006	A	C	T	G	A	T	A	T	T	A	T	G	G	T	A	A2076	J	M	M	R	I	M	K	J	M	M	M	M	N	K	K
137	A2078TAN	SameA1069		TZ17,D99-2589	A.Br.005.006	A	C	T	G	A	T	A	T	T	A	T	G	G	T	A	A2078	J	M	M	R	I	M	K	J	M	M	M	M	N	K	L
138	A0987BOT			M22/10/98	A.Br.005.006	A	C	T	G	A	T	A	T	T	A	T	G	G	T	A	A0987	N	M	M	R	I	M	J	I	M	M	M	M	N	K	L
139	A2116SOA			M0030	A.Br.005.006	A	C	T	G	A	T	A	T	T	A	T	G	G	T	A	A2116	O	M	M	R	I	M	J	P	M	M	M	M	N	K	L
140	A0435SOA	K1244	67	K3	A.Br.005.006	A	C	T	G	A	T	A	T	T	A	T	G	G	T	A	A0435	O	M	M	R	I	M	J	I	M	M	M	M	N	K	L
141	A2122SOA			M0036	A.Br.005.006	A	C	T	G	A	T	A	T	T	A	T	G	G	T	A	A2122	O	M	M	R	I	M	J	I	M	M	N	M	N	K	L
142	A1081ITA			1761/95/VR	A.Br.005.006	A	C	T	G	A	T	A	T	T	A	T	G	G	T	A	A1081	N	M	N	R	L	M	K	J	M	M	M	M	M	L	L
143	A2150SOA			M0064	A.Br.005.006	A	C	T	G	A	T	A	T	T	A	T	G	G	T	A	A2150	M	M	M	R	L	M	M	1	M	1	L	M	M	N	O
144	A0026ENG	K1355	21	16/32	A.Br.005.006	A	C	T	G	A	T	A	T	T	A	T	G	G	T	A	A0026	M	M	M	R	L	M	K	J	M	C	M	M	M	N	L
145	A0035ENG	K3612	24	25/32	A.Br.005.006	A	C	T	G	A	T	A	T	T	A	T	G	G	T	A	A0035	M	M	M	R	L	M	M	J	M	C	M	M	M	N	L
146	A0042NAM			32/32	A.Br.005.006	A	C	T	G	A	T	A	T	T	A	T	G	G	T	A	A0042	L	M	M	R	L	M	K	K	M	C	M	M	M	N	L
147	A0344ENG	K3166	22	Asc403	A.Br.005.006	A	C	T	G	A	T	A	T	T	A	T	G	G	T	A	A0344	L	M	M	R	L	M	K	J	M	C	M	M	M	N	L
148	A0461ZAM	K7724	26	1932-11-01	A.Br.005.006	A	C	T	G	A	T	A	T	T	A	T	G	G	T	A	A0461	M	M	M	R	L	M	J	K	M	M	M	M	N	N	L
149	A2075TAN			TZ14,D99-2249	A.Br.005.006	A	C	T	G	A	T	A	T	T	A	T	G	G	T	A	A2075	M	M	M	R	L	M	J	J	M	M	M	M	N	N	L
150	A0021ZAM			1932-11-01	A.Br.005.006	A	C	T	G	A	T	A	T	T	A	T	G	G	T	A	A0021	L	M	M	R	L	M	J	K	M	M	M	M	N	N	L
151	A0533SOA			6461	A.Br.005.006	A	C	T	G	A	T	A	T	T	A	T	G	G	T	A	A0533	M	M	M	R	L	M	K	N	M	M	M	M	N	M	L
152	A0740FRA			4661	A.Br.008/009	A	NTC	T	G	A	T	A	T	G	A	T	G	G	T	A	A0740	M	M	M	R	L	L	J	J	M	L	M	M	N	N	L
153	A1032ALB			1	A.Br.008/009	A	C	T	G	A	T	A	T	G	A	T	G	G	T	A	A1032	M	M	M	R	L	L	M	J	M	L	M	M	N	N	L
154	A00622POL	K1340		100004	A.Br.008/009	A	C	T	G	A	T	A	T	G	A	T	G	G	T	A	A0062-2	M	M	M	K	L	L	1	J	M	L	M	M	N	N	L
155	A0746FRA			9889	A.Br.008/009	A	NTC	T	G	A	T	A	T	G	A	T	G	G	T	A	A0746	M	M	M	R	L	L	K	J	M	L	M	M	N	N	L
156	A1076ITA			7953	A.Br.008/009	A	C	T	G	A	T	A	T	G	A	T	G	G	T	A	A1076	M	M	M	R	L	L	K	J	M	K	M	M	N	N	L
157	A0245TUR	K8127	11	2007-02-06	A.Br.008/009	A	C	T	G	A	T	A	T	G	A	T	G	G	T	A	A0245	M	M	N	R	L	L	N	J	M	L	M	M	N	N	L
158	A0140TUR	K4390??		6 Mut	A.Br.008/009	A	C	T	G	A	T	A	T	G	A	T	G	G	T	A	A0140	M	M	M	R	L	L	N	J	M	L	M	M	N	N	L
159	A1035ALB			4	A.Br.008/009	A	C	T	G	A	T	A	T	G	A	T	G	G	T	A	A1035	M	M	M	R	L	L	N	J	M	L	O	M	N	N	L
160	A0032CHI	K2129	13	22/32	A.Br.008/009	A	C	T	G	A	T	A	T	G	A	T	G	G	T	A	A0032	M	M	M	R	L	L	N	J	M	L	M	M	N	N	K
161	A0667CHI			63422	A.Br.008/009	A	C	T	G	A	T	A	T	G	A	T	G	G	T	A	A0667	M	M	M	R	L	L	M	J	M	L	M	M	N	N	K
162	A0241TUR	K7665	12	2007-01-06	A.Br.008/009	A	C	T	G	A	T	A	T	G	A	T	G	G	T	A	A0241	M	M	L	R	L	L	M	J	M	L	M	M	N	N	L
163	A0876ITA			42	A.Br.008/009	A	C	T	G	A	T	A	T	G	A	T	G	G	T	A	A0876	M	M	L	R	L	L	L	J	M	L	M	M	N	N	L
164	A0273FRA	K1598		16596	A.Br.008/009	A	C	T	G	A	T	A	T	G	A	T	G	G	T	A	A0273	K	M	M	R	L	L	L	J	M	L	M	M	N	N	L
165	A0742FRA			8324	A.Br.008/009	A	C	T	G	A	T	A	T	G	A	T	G	G	T	A	A0742	L	M	M	R	L	L	L	J	M	L	M	M	N	N	L
166	A0748FRA			11204	A.Br.008/009	A	NTC	T	G	A	T	A	T	G	A	T	G	G	T	A	A0748	M	K	M	R	L	L	L	J	M	L	M	M	N	N	L
167	A0888ITA			008/CE	A.Br.008/009	A	C	T	G	A	T	A	T	G	A	T	G	G	T	A	A0888	M	M	M	R	L	L	L	J	O	L	M	M	N	N	L
168	A0738FRA			5643	A.Br.008/009	A	NTC	T	G	A	T	A	T	G	A	T	G	G	T	A	A0738	M	M	M	R	L	L	L	J	M	L	M	M	N	N	L
169	A1144ARG			92/147	A.Br.008/009	A	C	T	G	A	T	A	T	G	A	T	G	G	T	A	A1144	M	M	M	R	1	L	L	J	M	L	M	M	N	N	L
170	A0149TUR	K9002	23	32	A.Br.008/009	A	C	T	G	A	T	A	T	G	A	T	G	G	T	A	A0149	M	M	M	R	L	M	Q	J	M	L	M	M	N	N	L
171	A1037ALB			6	A.Br.008/009	A	C	T	G	A	T	A	T	G	A	T	G	G	T	A	A1037	M	M	M	R	L	L	N	J	M	L	N	M	N	M	L
172	A0744FRA			8363	A.Br.008/009	A	C	T	G	A	T	A	T	G	A	T	G	G	T	A	A0744	M	M	M	R	L	L	I	J	M	L	N	M	N	N	L
173	A1033ALB			2	A.Br.008/009	A	C	T	G	A	T	A	T	G	A	T	G	G	T	A	A1033	M	M	M	R	L	L	O	J	M	L	N	M	N	N	L
174	A1048ITA			893D	A.Br.008/009	A	C	T	G	A	T	A	T	G	A	T	G	G	T	A	A1048	M	M	M	R	L	L	L	J	M	L	N	M	N	N	L
175	A0863ITA			29	A.Br.008/009	A	C	T	G	A	T	A	T	G	A	T	G	G	T	A	A0863	M	M	M	R	L	L	K	K	M	L	M	M	N	N	L
176	A1050ITA			1191D	A.Br.008/009	A	C	T	G	A	T	A	T	G	A	T	G	G	T	A	A1050	M	M	M	R	L	L	K	I	M	L	M	M	N	N	L
177	A0610CHI			63367	A.Br.008/009	A	C	T	G	A	T	A	T	G	A	T	G	G	T	A	A0610	M	M	M	R	L	L	K	K	M	L	M	M	N	N	K
178	A0604CHI			63351	A.Br.008/009	A	C	T	G	A	T	A	T	G	A	T	G	G	T	A	A0604	M	M	M	R	L	L	N	K	M	L	M	M	N	N	L
179	A0632CHI			63379	A.Br.008/009	A	C	T	G	A	T	A	T	G	A	T	G	G	T	A	A0632	M	M	M	R	L	L	N	K	N	L	M	M	N	N	L
180	A0643CHI			63390	A.Br.008/009	A	C	T	G	A	T	A	T	G	A	T	G	G	T	A	A0643	M	M	M	R	L	L	N	L	M	L	M	M	N	N	L
181	A0684CHI			63439	A.Br.008/009	A	C	T	G	A	T	A	T	G	A	T	G	G	T	A	A0684	M	M	M	R	L	M	N	L	M	L	M	M	N	N	L
182	A0674CHI			63429	A.Br.008/009	A	C	T	G	A	T	A	T	G	A	T	G	G	T	A	A0674	M	M	M	R	L	L	M	L	M	L	M	M	N	N	L
183	A0033CHI	K8071	14	23/32	A.Br.008/009	A	C	T	G	A	T	A	T	G	A	T	G	G	T	A	A0033	M	M	M	R	L	L	N	L	M	L	N	M	N	N	L
184	A0596CHI			63672	A.Br.008/009	A	C	T	G	A	T	A	T	G	A	T	G	G	T	A	A0596	M	M	M	R	L	L	P	L	M	L	N	M	N	N	L
185	A0324SLO	K3974		A22	A.Br.008/009	A	C	T	G	A	T	A	T	G	A	T	G	G	T	A	A0324	N	M	M	R	L	L	M	I	M	L	M	M	N	N	L
186	A0058HUN		16-like	1998-02-01	A.Br.008/009	A	C	T	G	A	T	A	T	G	A	T	G	G	T	A	A0058	N	M	M	R	L	L	N	K	M	L	M	M	N	N	L
187	A0362NOR	K8091	17	B6273/93	A.Br.008/009	A	C	T	G	A	T	A	T	G	A	T	G	G	T	A	A0362	N	M	M	R	L	L	N	J	M	L	M	M	N	N	L
188	A00621POL	K1340	15	100004	A.Br.008/009	A	C	T	G	A	T	A	T	G	A	T	G	G	T	A	A0062-1	N	M	M	R	L	L	N	L	M	L	M	M	N	N	L
189	A0675CHI			63430	A.Br.008/009	A	C	T	G	A	T	A	T	G	A	T	G	G	T	A	A0675	K	M	M	R	L	L	N	L	M	L	M	M	N	N	L
190	A0692CHI			63447	A.Br.008/009	A	C	T	G	A	T	A	T	G	A	T	G	G	T	A	A0692	K	M	M	R	L	L	N	J	M	L	M	M	O	N	L
191	A0293ITA	K4241	20	2PT	A.Br.008/009	A	C	T	G	A	T	A	T	G	A	T	G	G	T	A	A0293	K	K	M	R	L	L	K	J	M	L	M	M	N	N	L
192	A0343HUN	K1430	19	1998-04-01	A.Br.008/009	A	C	T	G	A	T	A	T	G	A	T	G	G	T	A	A0343	K	M	M	R	L	L	K	J	M	L	M	M	N	M	L
193	A0845ITA			7	A.Br.008/009	A	C	T	G	A	T	A	T	G	A	T	G	G	T	A	A0845	K	M	M	R	L	L	K	J	M	L	M	M	N	N	L
194	A0897ETH			900	A.Br.008/009	A	C	T	G	A	T	A	T	G	A	T	G	G	T	A	A0897	M	K	M	R	L	M	K	J	M	L	M	L	N	N	L
195	A0840ITA			2	A.Br.008/009	A	C	T	G	A	T	A	T	G	A	T	G	G	T	A	A0840	M	M	M	R	L	L	K	M	M	L	M	L	N	N	L
196	A0854ITA			19	A.Br.008/009	A	C	T	G	A	T	A	T	G	A	T	G	G	T	A	A0854	M	M	M	R	L	L	K	J	M	Q	M	L	N	N	L
197	A0280ITA	K0021	1	1FG	A.Br.008/009	A	C	T	G	A	T	A	T	G	A	T	G	G	T	A	A0280	M	M	M	R	L	L	K	J	M	L	M	L	N	N	L
198	A0866ITA			32	A.Br.008/009	A	C	T	G	A	T	A	T	G	A	T	G	G	T	A	A0866	M	M	M	R	L	L	K	J	M	L	N	L	N	N	L
199	A0875ITA			41	A.Br.008/009	A	C	T	G	A	T	A	T	G	A	T	G	G	T	A	A0875	M	M	M	R	L	L	K	J	M	L	O	L	N	N	L
200	A0843ITA			5	A.Br.008/009	A	C	T	G	A	T	A	T	G	A	T	G	G	T	A	A0843	M	M	M	R	L	L	L	J	M	M	N	M	N	N	M
201	A06811ITA			63436	A.Br.008/009	A	C	T	G	A	T	A	T	G	A	T	G	G	T	A	A0861	M	M	M	R	L	L	L	J	M	M	N	M	N	N	L
202	A0463PAK	K5135	29	PAK-1	A.Br.008/009	A	C	T	G	A	T	A	T	G	A	T	G	G	T	A	A0463	M	K	M	P	L	M	N	J	M	L	M	M	N	N	L
203	A1116IRN			1	A.Br.008/009	A	C	T	G	A	T	A	T	G	A	T	G	G	T	A	A1116	M	K	M	R	L	M	N	J	M	M	M	M	N	N	L
204	A0264TUR	K7948	28	14	A.Br.008/009	A	C	T	G	A	T	A	T	G	A	T	G	G	T	A	A0264	M	M	L	R	L	M	I	J	M	L	N	M	N	N	L
205	A0193USA	K1256	10	96-10355	A.Br.WNA	A	C	T	G	A	T	A	T	G	G	T	G	G	T	A	A0193	M	M	N	R	L	L	L	J	M	M	M	M	N	M	L
206	A0308CAN	K1081	5	91-382C-1	A.Br.WNA	A	C	T	G	A	T	A	T	G	G	T	G	G	T	A	A0308	M	M	M	R	L	L	L	I	M	M	M	M	N	N	L
207	A0369CAN	K8960	7	89	A.Br.WNA	A	C	T	G	A	T	A	T	G	G	T	G	G	T	A	A0369	L	M	M	R	L	L	L	I	M	M	M	M	N	N	L
208	A0300CAN	K2284	2	80-167C-5	A.Br.WNA	A	C	T	G	A	T	A	T	G	G	T	G	G	T	A	A0300	M	M	M	R	L	L	K	I	M	M	M	M	N	N	L
209	A0374USA	K8113	4	BA1007/#81	A.Br.WNA	A	C	T	G	A	T	A	T	G	G	T	G	G	T	A	A0374	M	M	M	R	L	L	L	K	M	M	M	M	N	N	L
210	A0377HAI	K3907		42	A.Br.WNA	A	C	T	G	A	T	A	T	G	G	T	G	G	T	A	A0377	M	M	M	R	L	L	L	K	M	M	N	M	N	N	L
211	A0168CAN	K1040	8	72-241C-A	A.Br.WNA	A	C	T	G	A	T	A	T	G	G	T	G	G	T	A	A0168	M	M	M	R	M	L	L	J	M	M	M	M	N	N	L
212	A0985USA			00-14543	A.Br.WNA	A	C	T	G	A	T	A	T	G	G	T	G	G	T	A	A0985	M	M	M	R	I	L	L	J	M	M	M	M	N	N	L
213	A0172CAN	K3897	9	74-389C-52	A.Br.WNA	A	C	T	G	A	T	A	T	G	G	T	G	G	T	A	A0172	M	M	M	R	M	L	J	J	M	M	M	M	N	N	L
214	A0055USA			1475	A.Br.WNA	A	C	T	G	A	T	A	T	G	G	T	G	G	T	A	A0055	O	M	M	R	L	L	L	J	M	M	M	M	N	N	L
215	A0444CAN	K4152		M94-5027	A.Br.WNA	A	C	T	G	A	T	A	T	G	G	T	G	G	T	A	A0444	M	M	M	R	L	L	L	J	M	M	M	L	N	N	L
216	A0174CAN	K1979		74-412C-8	A.Br.WNA	A	C	T	G	A	T	A	T	G	G	T	G	G	T	A	A0174	M	M	M	R	L	L	L	J	M	M	M	M	N	N	L
217	A1119USA			5642	A.Br.WNA	A	C	T	G	A	T	A	T	G	G	T	G	G	T	A	A1119	M	M	M	R	L	L	L	J	M	M	M	M	N	J	L
218	A0392USA	KK2165	6	C93022281	A.Br.WNA	A	C	T	G	A	T	A	T	G	G	T	G	G	T	A	A0392	L	M	M	R	L	L	L	J	M	L	K	L	N	N	L
219	A2014MEX			Mexico A	A.Br.WNA	A	C	T	G	A	T	A	T	G	G	T	G	G	T	A	A2014	L	M	M	L	L	L	L	J	M	M	M	L	N	N	L
220	A0157USA	K7682		4728	A.Br.WNA	A	C	T	G	A	T	A	T	G	G	T	G	G	T	A	A0157	M	M	M	R	L	L	K	J	M	M	M	M	N	N	L
221	A0192CAN	K4988		94-188C-1	A.Br.WNA	A	C	T	G	A	T	A	T	G	G	T	G	G	T	A	A0192	M	M	M	R	L	M	L	J	M	M	M	M	N	N	L
