# Supplementary material for: Global Genetic Population Structure of Bacillus anthracis
Source: PLoS One. 2007 May 23;2(5):e461. doi: 10.1371/journal.pone.0000461 (PMC1866244; doi:10.1371/journal.pone.0000461)
Supplement: Table S2 — The MLVA Sizing Code. The VNTR alleles for each MLVA marker in Supplemental Table S1 are letter coded according to size to allow these data sets to be utilized by various tree drawing programs. Apparent MLVA fragment sizes vary from instrument to instrument and even with various size standards. Allele codes provide a common designation in the face of this variation. Table S2 provides a code that describes the fragment sizes for these alleles based on analysis on an ABI 3100 Genetic Analyzer (see Protocol S3), a custom made LIZ®-labeled internal size standard (5), and subsequent analysis using Genotyper. The numeral 1 appears as a code when a fragment failed to amplify; eg., an isolate lacking the pXO1 plasmid would not be able to amplify the pXO1.1AAT VNTR marker. (0.02 MB XLS) [file pone.0000461.s002.xls]

## Sheet: Coding Sheet
Supplement Table S5.1: MLVA Fragment sizes and Allele codes
B. anthracis MLVA-8 Coding System v101402
	Allele Code	vrrA	vrrB1	vrrB2	vrrC1	vrrC2	CG3	pX01.1AAT	pX02.AT
	A
	B
	C
	D
	E
	F
	G					458			131
	H				362
	I				390	529		114	134
	J	273	179		399			117.4-118.5	136
	K	284-285	188	137	428			120	138
	L	296-297	215	146	472	600	147-148	123	140
	M	308	224	154	499	603	152	126-127	142
	N	320	251	163		635	157	130	143.5
	O	332	287	172	536			133	145.5
	P				545			136-137	147.5
	Q				581			139	149.5
	R				617
	S				690				153.4
	T
	U
	V
	W
	X
	Y
	Z							142
	repeat size	12 bp	9 bp	9 bp	36 bp	36 bp	5 bp	3 bp	2 bp
	B. anthracis MLVA-7 Coding System v101402
	Allele Code	VNTR12	VNTR16	VNTR17	VNTR19	VNTR23	VNTR32	VNTR35
	A
	B
	C		137
	D
	E
	F
	G
	H						382
	I						403
	J						424.5
	K		259	366			445	102
	L	107	266-267	374	91	170	466	108
	M	109	274-275	382	94	182	486	115
	N	111.5	283	390	96	194	506	121
	O	113.5	290	399		206	527	126.5
	P		298				569
	Q		307
	R
	S
	T		331.5	441.5			691
	U		339.5	449
	V
	W
	X
	Y
	Z
	repeat size	2bp	8bp	8bp	3bp	12bp	33bp	6bp
